# Supplementary material for: Excited state properties of monomeric and dimeric axially bridged indium phthalocyanines upon UV–Vis laser irradiation
Source: Royal Society of Chemistry journal article supplement (doi:10.1039/b308677a), 2004-01-01
Supplement: b308677a.doc [file b308677a.doc]

# **ELECTRONIC SUPPLEMENTARY INFORMATION**

# Synthesis

[*t*Bu4PcIn]2(TFP) (**3**) is synthesized in ultrasonic bath with yield 86 %, by reaction of [*t*Bu4PcInCl] (**1**) with freshly prepared BrMgF4C6MgBr in presence of *N*,*N*,*N´*,*N´*-tetramethylethylenediamine (tmed) as catalyst. In absence of tmed, the monomeric complexes *t*Bu4PcIn(*p*-BrC6F4), *t*Bu4PcIn(TFP), *t*Bu4PcMg or *t*Bu4PcInBr are formed, instead. The dimers [*t*Bu4PcInCl]2.dib (**4**) and [*t*Bu4PcIn(*p*-TMP)]2.dib (**5**) are synthesized by reaction of stoichiometric amounts of dib with **1** and [*t*Bu4PcIn(*p*-TMP)] (**2**), respectively, under reflux in anhydrous chlorobenzene (yields: 90 and 64% for **4** and **5**, respectively).

*1H-NMR and 13C-NMR Spectra*

The 1H-NMR spectrum of **1** shows three multiplets in the aromatic region centered at  = 8.30, 9.30 and 9.45 ppm for the 1-H, 2-H and the 2´-H protons (Figure 1), respectively. Downfield shifts were observed for these protons in **3** when compared to **1**, which is very similar to that observed in axially aryl substituted *t*Bu4PcIn complexes, e.g. **2**. Also, in the 13C-NMR spectrum of **2** a slight deshielding effect is observed for the carbon atoms close to indium. Because of the C-F coupling that leads to splitted signals of low intensity, the 13C-NMR signals of the axial ligand in **2** are not observed. The proton signals of the dib ligand in **4** and **5** were found at  = 2.82 and 3.74 ppm, respectively, whereas the 1H-NMR signal of free dib appears at 7.41 ppm. This shows that the large ring-current effect between two phthalocyanine rings, and the electron-withdrawing effect of the isocyanide group give rise to stronger shielding of the aromatic protons of the dib ligand in **4** and **5**. Coordination of dib with the central indium atom in **4** and **5** also leads to apparent shielding of the carbon atoms closer to the heteroaromatic ring system ( C-4, 4´, C-3, C-3´, see Figure 1) compared to the corresponding parent compounds **1** and **2**. The largest upfield shift exhibited by C-4,4´ was found to be about 0.11 ppm for **4**, and 0.45 ppm for **5**, respectively. Coordination of dib with **1** and **2** does not result in any significant changes in the 1H resonance of the macrocycles.

*19 F-NMR Spectra*

In the 19F NMR spectrum of **3**, one singlet at -132 ppm of the axial ligand (C6F4) was observed, whereas the 19F NMR signals of any possible trapped impurities or byproducts such as 2,3,5,6-tetrafluorobenzene (/ppm:-139),10 *t*Bu4PcIn(*p*-BrC6F4)9 [ /ppm: -121.28 to -121.48; -133.27 to -133.52], *t*Bu4PcIn(TFP)5 [ /ppm: -123.79 to -124.04; -139.30 to -139.57 ] were not detected. When compared to 2,3,5,6-tetrafluorobenzene (/ppm: -139 ppm), the *o*-fluorine atoms close to the indium atom in **3** are strongly deshielded with  = 7 ppm. A deshielding of aromatic F atoms in complexes located in the ortho-position of a metal–carbon bond is observed. For **2**, one narrow singlet at –64.1 ppm, whose value is close to the fluorine signal in , , -trifluorotoluene at –63.9 ppm, was observed. After coordination of dib with the indium atom in **2**, the 19F signal for the same fluorine atoms appears at –62.9 to –64.1 ppm, implying the fluorine atoms on the axial-substituent *p*-TMP are partially shielded.

###### FTIR Spectra

The FTIR spectrum of **3** differs greatly from that of the parent compound **1** with appearance of a strong new peak at 802 cm-1, due to the bending vibration of the C–F bond at the axial ligand. The In–C stretching mode can not be unambiguously assigned due to coupling with C–C modes and vibrations of the phthalocyanine macrocycle. Pure dib shows that the NC stretching mode appears at 2132 cm-1, whereas the NC absorption in **4** and **5** are found at 2118 and 2113 cm-1, respectively. The shift of this absorption on changing from free to indium coordinated ligand is due to a transfer of electron density from the central metal indium to strong antibonding * orbitals of the aromatic isocyanide ligand ( back-donation), which dominates the -donor bond from the ligand to the metal. This fact causes a destabilization of the NC triple bond and hence an apparent drop of the corresponding NC frequency in comparison to the free ligand. The In–Cl absorption in **4** is the same as that in **1**,and appears at 336 cm-1.

###### Mass Spectra

The molecular ion peak of **3** was not observed in the field-ionization mass spectrum (FD-MS), only a strong peak appears at *m/z* 930.0, whose value is close to the molecular weight of *t*Bu4PcInBr (931.69 g/mol). To make sure that this signal is not due to *t*Bu4PcInBr, the FD-Mass spectrum of *t*Bu4PcInBr was measured, which showed molecular ion peaks centered at *m/z* (%) 932.7 (100) [M+(81Br)] and 930.5 (88)[M+(79Br)]. Thus, the new peak at *m/z* 930.0 may be attributed to the doubly charged ion of [*t*Bu4PcIn]2(TFP). Unlike the parent compounds **1** and **2,** the molecular peaks of complexes **4**, **5** are not observed in the FD and FAB modes, except for fragmentation peaks. In the FAB-MS spectrum of **5**, some fragment peaks are located at *m/z* 1944 [M+– (*p*-TMP) – 2 CH3], 1848 [M+– (*p*-TMP) – 2 *t*Bu – CH3], 1720, 996.5 [*t*Bu4PcIn(*p*-TMP)+], and 851.5 [*t*Bu4PcIn+]. The main fragment peaks of **4** appear at *m/z* 1854 (M+ – 3 CH3), 1737 [M+– 3 *t*Bu], 1556[M+–6 *t*Bu], 1365, 1206, 1016, 885.7 [*t*Bu4PcInCl+], and 850.8 [*t*Bu4PcIn+]. MALDI-TOF mass spectrometry has been also used to determine the masses of the dimeric species **3**-**5** because of the milder conditons of operation. Molecular peak of **3** at 1863[MH+] could be observed together with the peaks corresponding to **3** fragmentation following the loss of alkyl groups (CH3, *t*Bu) and/or bridging ligand TFP. Analogously, low intensity signals associated with molecular peaks of **4** [MH+: 1903 ] and **5** [MH+: 2124] could be detected through MALDI-TOF, together with the peaks corresponding to **4** and **5** fragmentations following the loss of alkyl groups (CH3, *t*Bu), axial ligands (*p*-TMP), and bridging ligand dib.

### Transient Absorption Spectroscopy

Nanosecond transient absorption measurements were carried out in toluene using the third harmonic generation (THG, 355 nm, 24 J/pulse) of a Nd:YAG laser as an excitation source. Probe light from a pulsed Xe lamp was detected with a Si-PIN photodiode equipped with a monochromator, after passing through the sample in a quartz cell (1 cm x 1 cm).

## Fluorescence Spectra

Fluorescence spectra (excitation:355 nm) were measured in toluene on a Shimadzu RF-5300PC spectrofluorophotometer. Fluorescence lifetimes were measured by a single-photon counting method using an argon ion laser, a pumped Ti:sapphire laser (Spectra-Physics, Tsunami 3950-L2S, fwhm 1.5 ps) with a pulse selector (Spectra-Physics, 3980), a second harmonic generator (Spectra-Physics, GWU-23PS), and a streakscope (Hamamatsu Photonics, C4334 ± 01). Each sample was excited in toluene with 410 nm laser light.

Every decay could be fitted with a single exponential.

*Optical Limiting Measurements*

The OL effect for the dimeric indium phthalocyanines **3**, **4**, and **5** has been studied with the Z-scan technique in the open aperture configuration. The samples are solutions of dimers in toluene with concentrations 0.8 - 110-4 M. The optical cell was a quartz cuvette with optical path thickness equal to 0.1 cm. The sample irradiation was realized with a pulsed Nd:YAG laser (from Continuum Minilite, Edinburgh, Scotland) emitting at the second harmonic ( = 532 nm). Samples linear transmittance at the wavelength of laser irradiation ranged in the interval 90-95 %. The maximum energy per laser pulse was 100 mJ. The pulse duration ranged in the interval 3-7 ns. The frequency of sample irradiation was 10 pulses per second. The Nd:YAG laser beam was focused with a neutral lens having the focal distance equal to 10 cm. The beam was spatially filtered to remove the far field contribution and was tightly focused to a spot of about 20 m. During the Z-scan determinations the sample spanned a total length of 3.5 cm centered at the beam focus. The displacement of the sample along the Z-scan direction is controlled by means of a piezoelectric driver. The laser beam radius is approximately 0.5 cm before lens focusing. The recording of sample transmittance is taken every 0.05 cm along the spanned length. The reported values of transmittance are averaged on a basis of twenty determinations per analyzed Z-position.
